# Supplementary material for: A facile synthesis of iron oxide nanoparticles as a nano-sensor to detect levofloxacin and ciprofloxacin in human blood and evaluation of their biological activities
Source: Royal Society of Chemistry journal article supplement (doi:10.1039/d4ra05024j), 2024-01-01
Supplement: d4ra05024j1.pdf [file d4ra05024j1.pdf]

## A facile synthesis of iron oxide nano-sensor to detect levofloxacin and ciprofloxacin in human blood and evaluation of their biological activities

Erum Hasan<sup>a</sup>, Ziana Manzar<sup>a</sup>, Nabeel Haroon<sup>a</sup>, Ali Raza<sup>a</sup>, Syed Nawazish Ali\*<sup>a</sup>, Mehreen Lateef<sup>fb</sup>, and Sabira Begum<sup>c</sup>

<sup>a</sup>Department of Chemistry, University of Karachi, Pakistan

Corresponding Author Email: snali@uok.ed.pk

### Electronic Supplementary Material

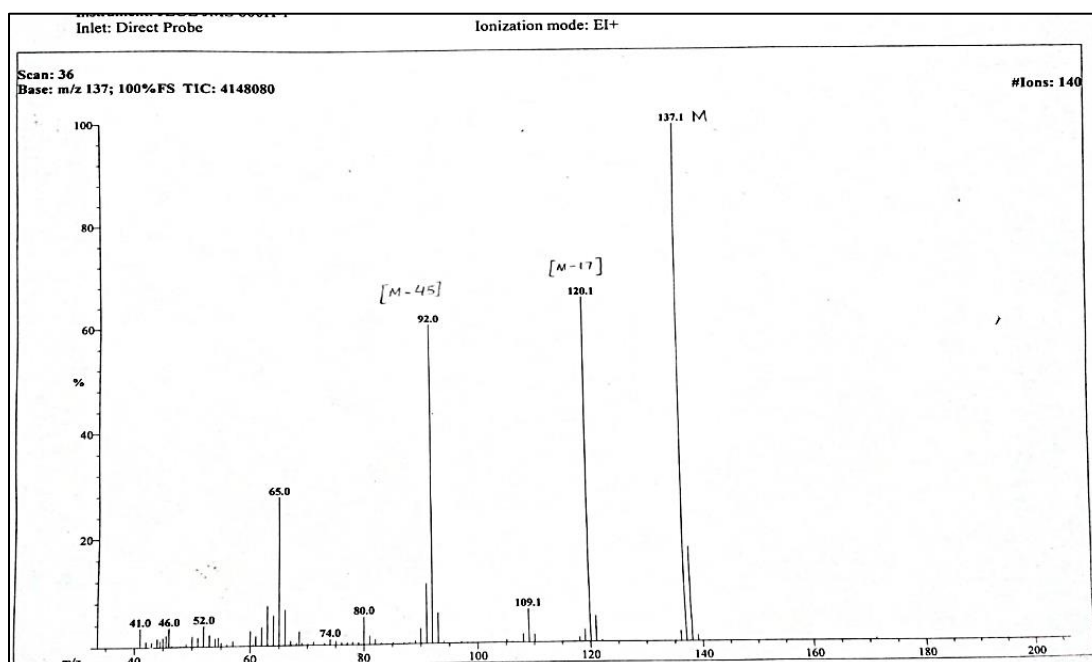

Fig. S1: Mass spectrum of 3-ABA

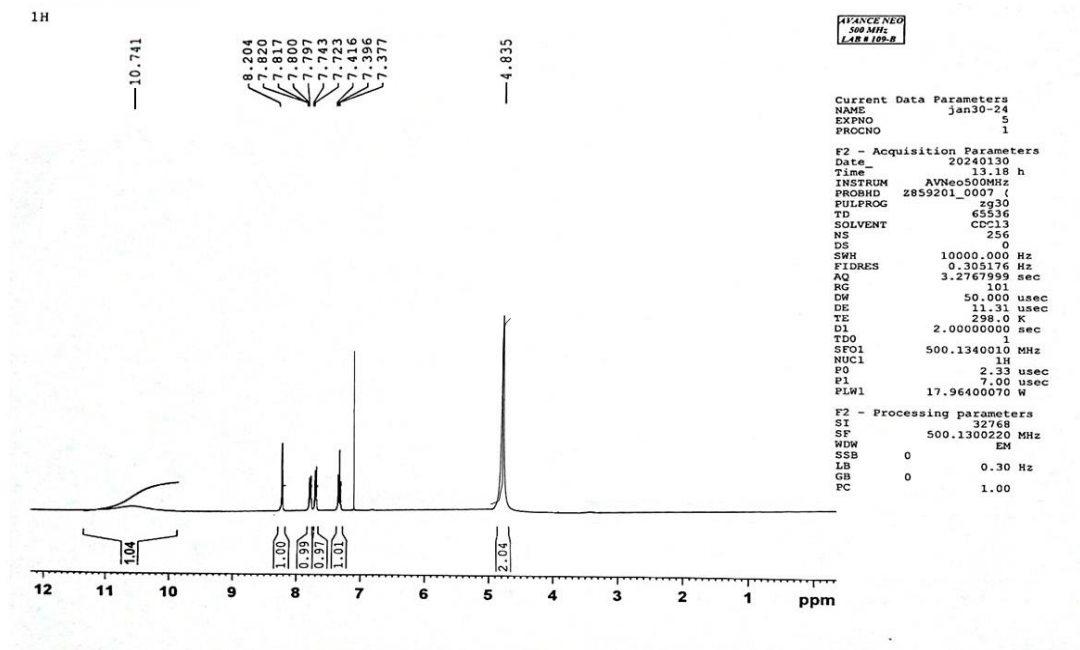

Fig. S2: <sup>1</sup>H-NMR spectrum of 3-ABA

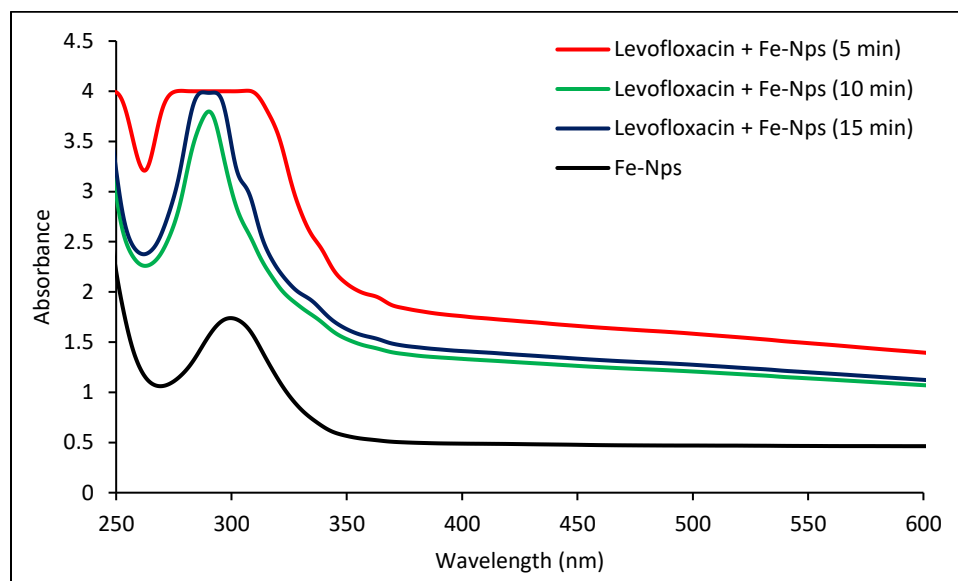

Fig. S3: Temporal study of stable complex formation between levofloxacin and iron oxide nanoparticles

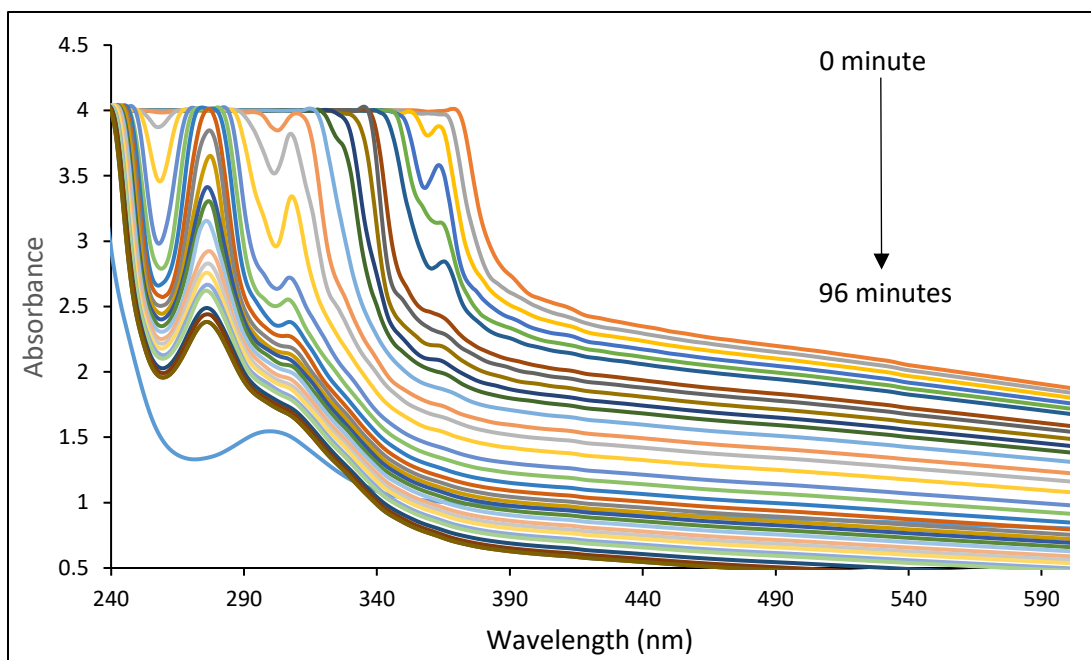

**Fig. S4:** Temporal study of stable complex formation between ciprofloxacin and iron oxide nanoparticles on 3min interval

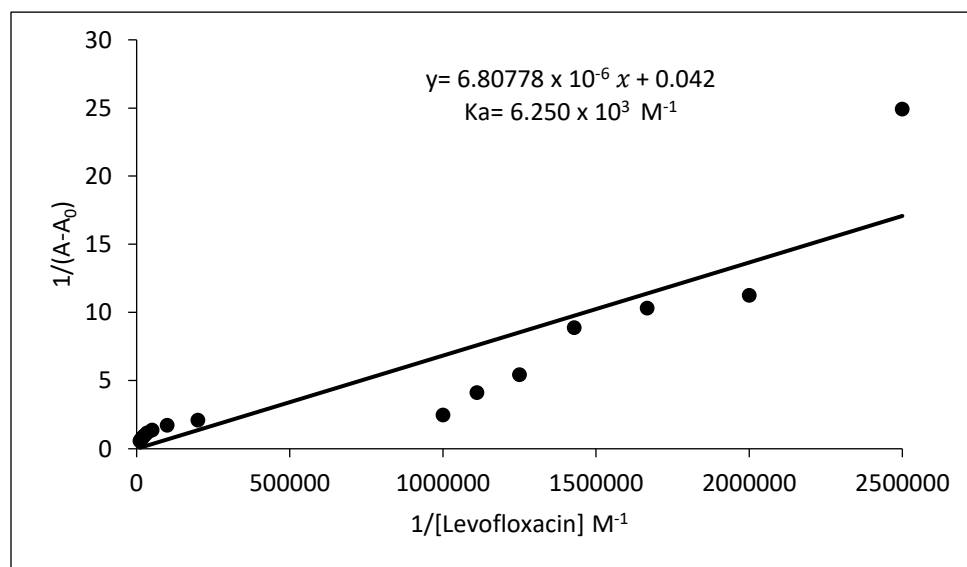

**Fig. S5:** Stability constant of complexation between Levofloxacin and Fe-Nps measure by applying Benesi Hildebrand equation

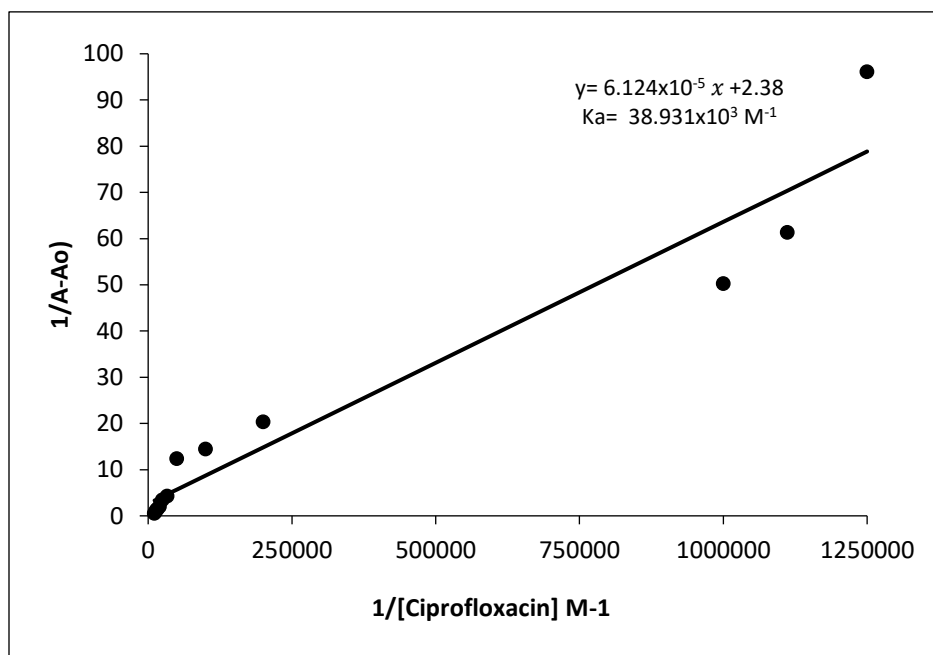

**Fig. S6:** Stability constant of complexation between ciprofloxacin and Fe-Nps measure by applying Benesi Hildebrand equation

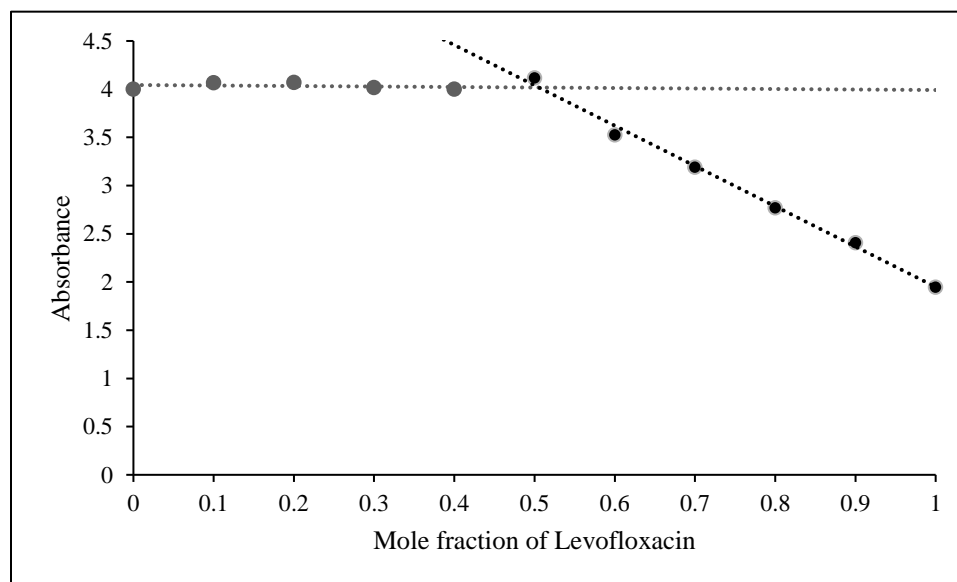

**Fig. S7:** job's plot for the complexation of levofloxacin and Fe-Np

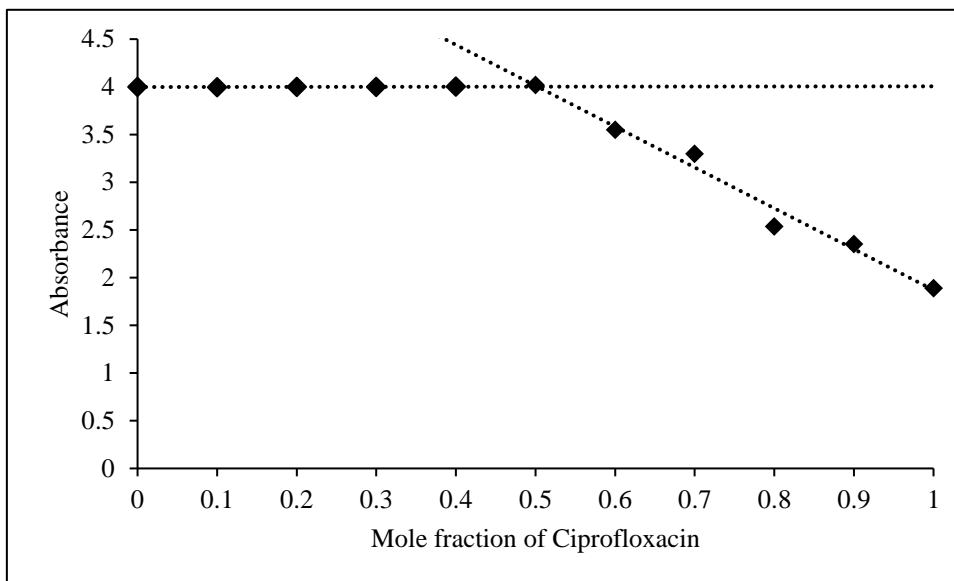

**Fig. S8:** Job's plot for the complexation of ciprofloxacin and Fe-Nps

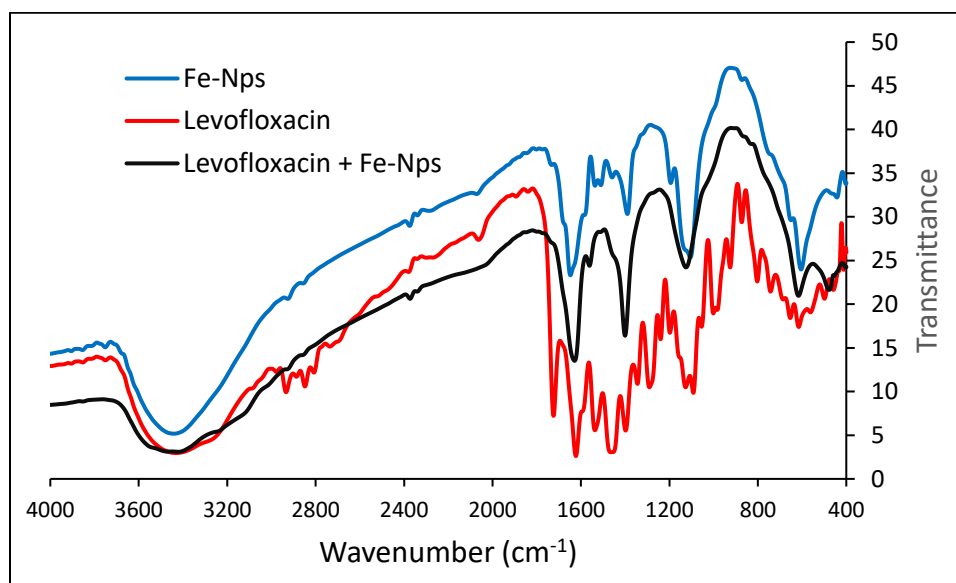

**Fig. S9:** FT-IR spectra of Fe-Nps, levofloxacin and levofloxacin with Fe-Nps

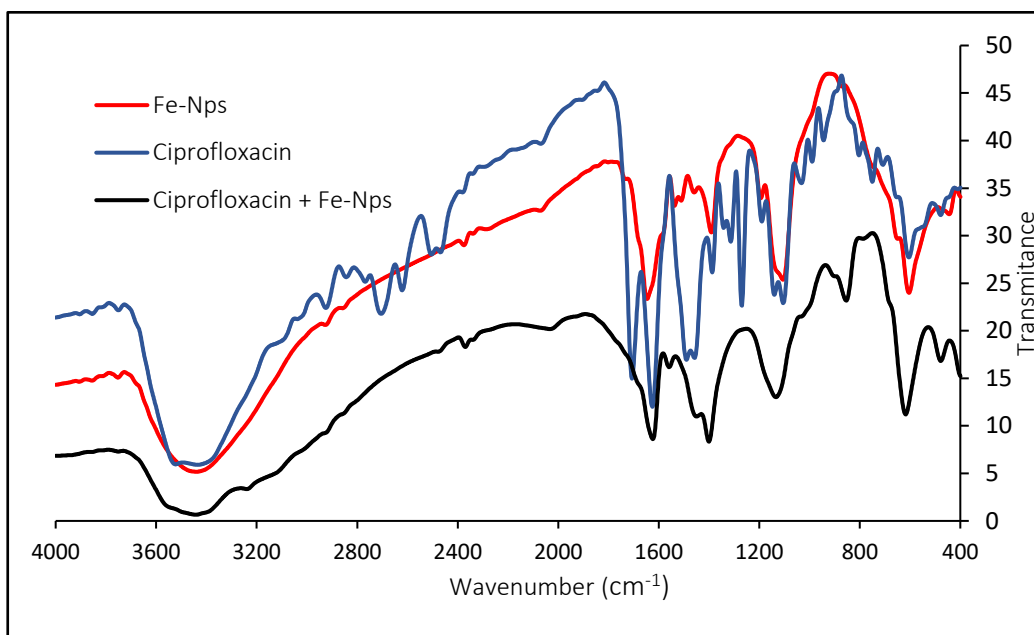

**Fig. S10:** FT-IR spectra of Fe-Nps, ciprofloxacin and ciprofloxacin with Fe-Nps Complex

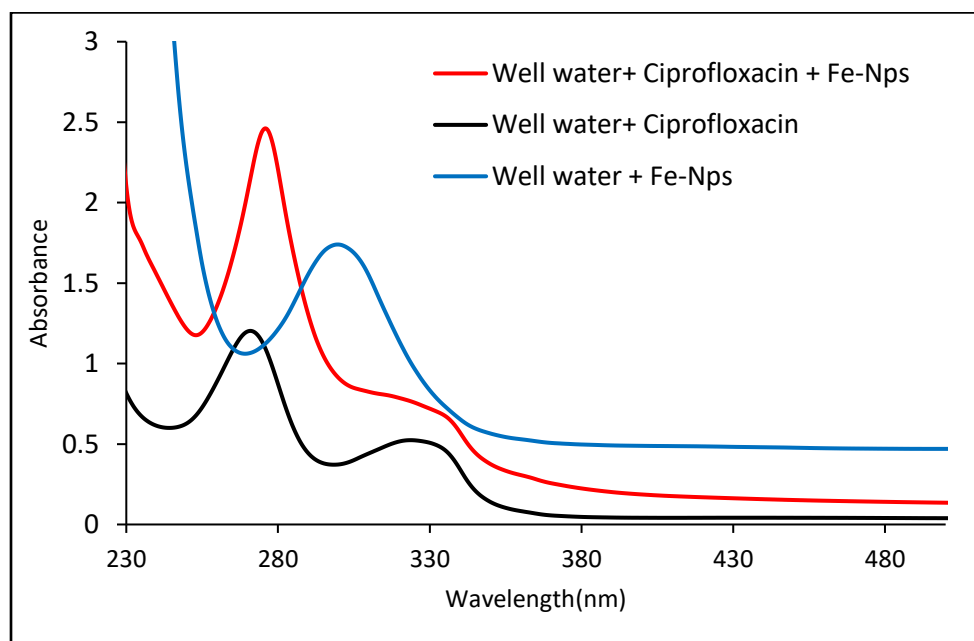

**Fig. S11:** Analysis of ciprofloxacin in well water

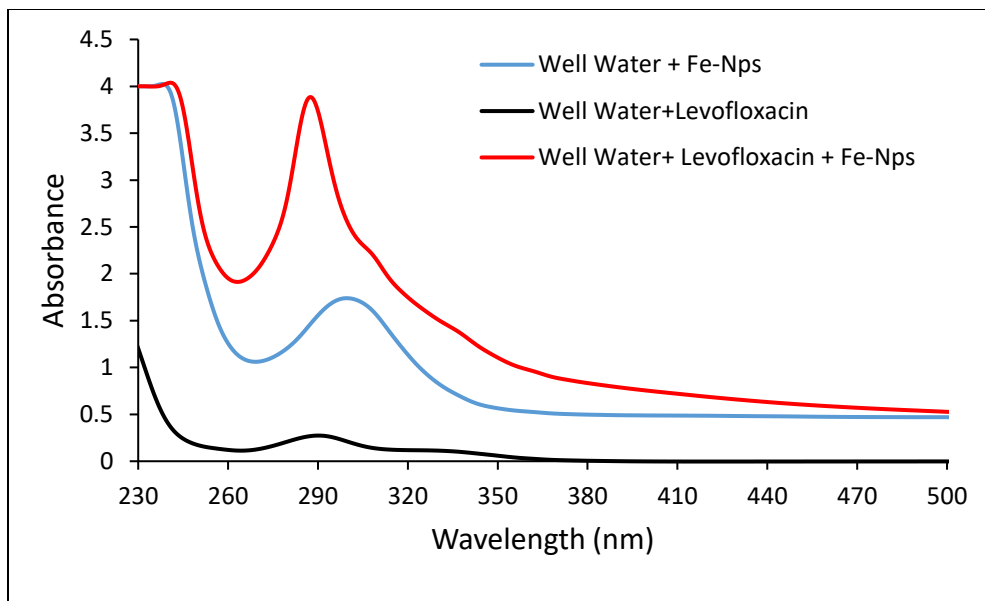

**Fig. S12:** Analysis of levofloxacin in well water

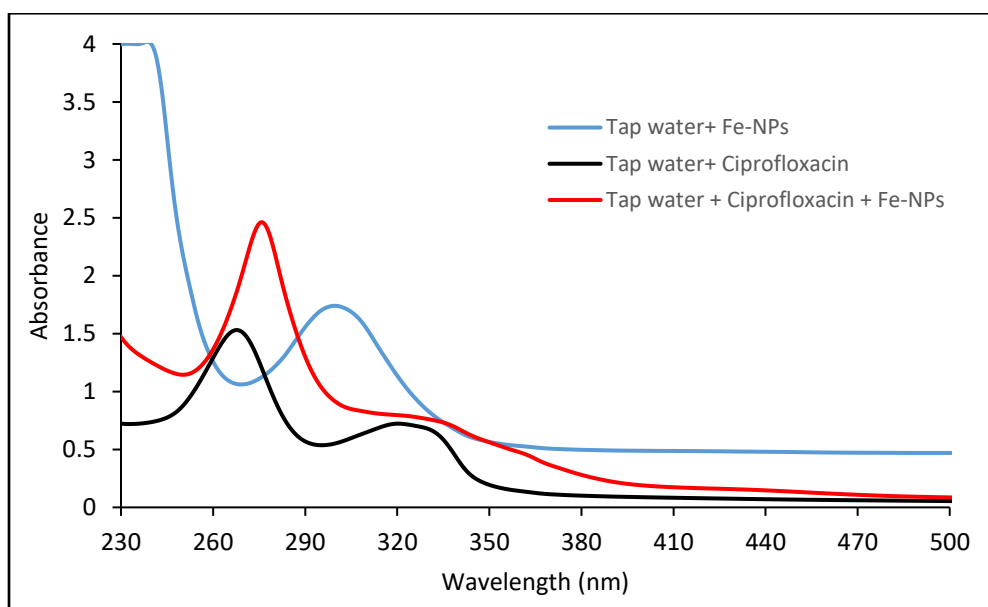

**Fig. S13:** Analysis of ciprofloxacin in tap water

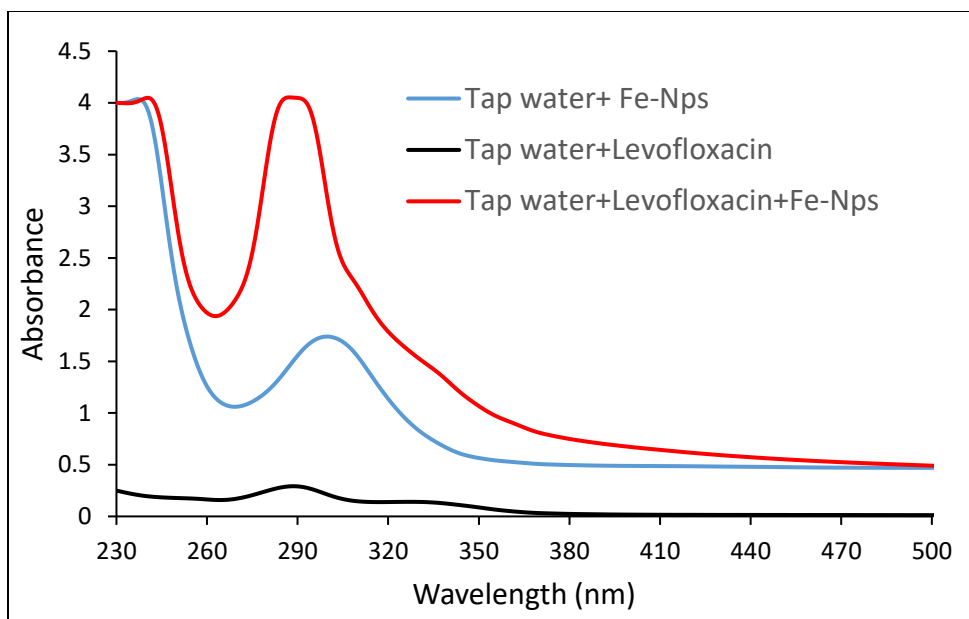

**Fig. S14:** Analysis of levofloxacin in tap water

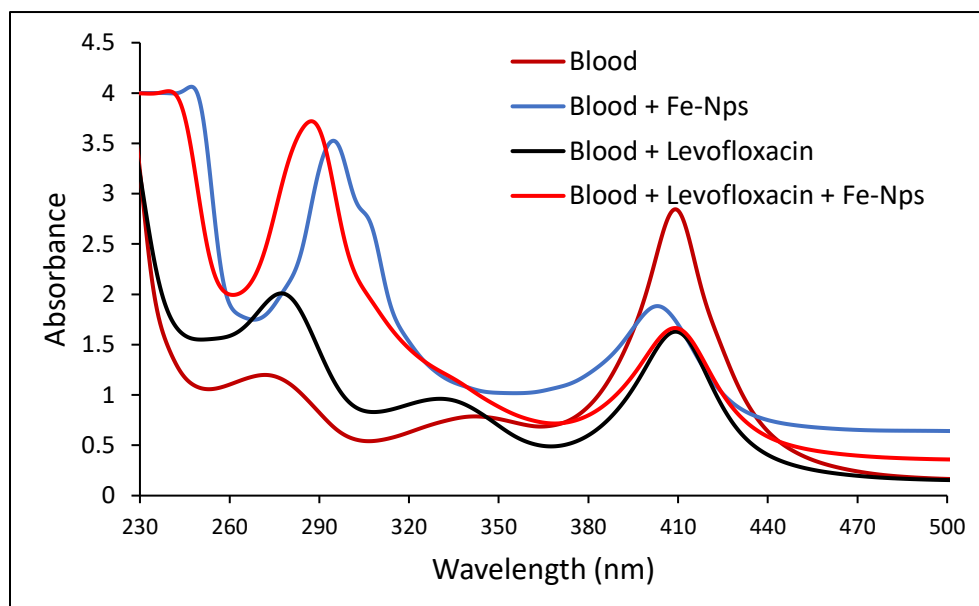

**Fig. S15:** Analysis of levofloxacin in human blood



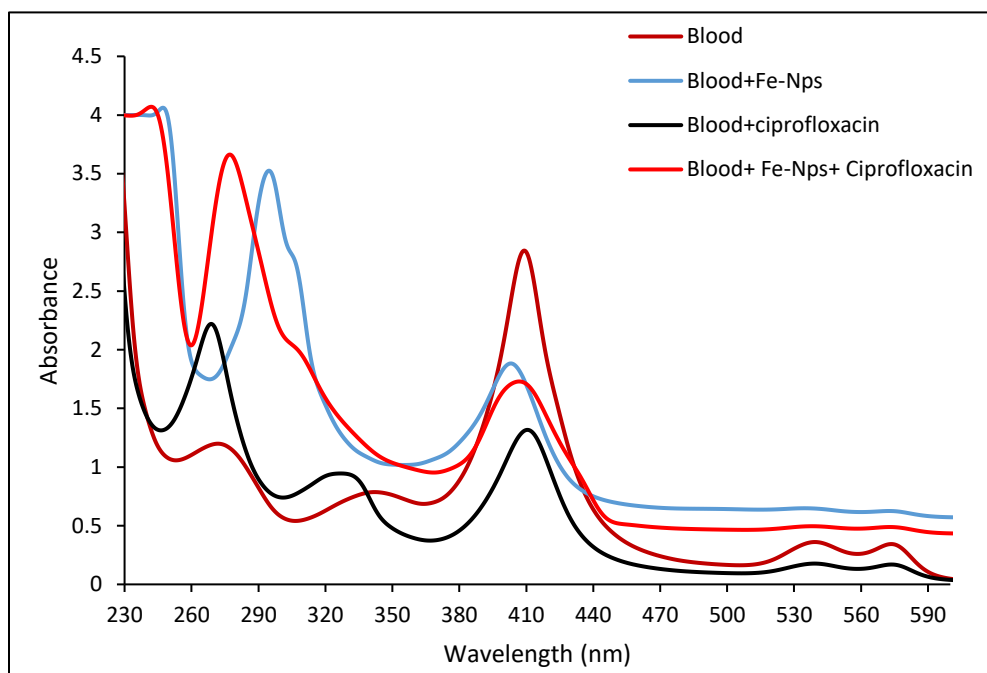

**Fig. S16:** Analysis of ciprofloxacin in human blood

**Table S1** Absorbance at regular time intervals

| Time (minutes)       | Absorbance | Time (minutes)      | Absorbance |
|----------------------|------------|---------------------|------------|
| <b>Ciprofloxacin</b> |            |                     |            |
| 0                    | 4          | 57                  | 3.808      |
| 3                    | 4          | 60                  | 3.6142     |
| 6                    | 4          | 63                  | 3.3389     |
| 9                    | 4          | 66                  | 3.2429     |
| 12                   | 4          | 69                  | 3.06       |
| 15                   | 4          | 72                  | 2.8977     |
| 18                   | 4          | 75                  | 2.7956     |
| 21                   | 4          | 78                  | 2.7101     |
| 24                   | 4          | 81                  | 2.6336     |
| 27                   | 4          | 84                  | 2.576      |
| 30                   | 4          | 87                  | 2.4602     |
| 33                   | 4          | 90                  | 2.4177     |
| 36                   | 4          | 93                  | 2.3533     |
| 39                   | 4          | 96                  | 2.3533     |
| 42                   | 4          | <b>Levofloxacin</b> |            |
| 45                   | 4.0008     | 5                   | 4          |
| 48                   | 4.0127     | 10                  | 3.8024     |
| 51                   | 4.0134     | 15                  | 3.7976     |
| 54                   | 3.9678     |                     |            |
